# Supplementary material for: The Development and Testing of a Patient Decision Aid for Individuals with Homologous Recombinant Proficient Ovarian Cancer Who Are Considering Niraparib Maintenance Therapy
Source: MDPI journal article supplement (doi:10.3390/curroncol31030107), 2024-03-08
Supplement: s1 [file s1]

## **Patient Decision Aid on Niraparib Treatment – Patient Survey**

**Please circle the best answer to each question.**

- 1) The language used was easy to follow.

|                   |          |         |       |                |
|-------------------|----------|---------|-------|----------------|
| Strongly Disagree | Disagree | Neutral | Agree | Strongly Agree |
|-------------------|----------|---------|-------|----------------|

Comment: \_\_\_\_\_

- 2) The amount of information provided was:

|                          |                            |             |                            |                          |
|--------------------------|----------------------------|-------------|----------------------------|--------------------------|
| Much less than<br>wanted | Little less than<br>wanted | About right | Little more than<br>wanted | Much more than<br>wanted |
|--------------------------|----------------------------|-------------|----------------------------|--------------------------|

Comment: \_\_\_\_\_

- 3) The length of the decision aid was:

|           |            |          |
|-----------|------------|----------|
| Too short | Just right | Too long |
|-----------|------------|----------|

Comment: \_\_\_\_\_

- 4) The Benefits and Harms sections were easy to follow:

|                   |          |         |       |                |
|-------------------|----------|---------|-------|----------------|
| Strongly Disagree | Disagree | Neutral | Agree | Strongly Agree |
|-------------------|----------|---------|-------|----------------|

Comment: \_\_\_\_\_

- 5) I found the decision aid was:

- ☐ Slanted towards treatment
- ☐ Slanted towards no treatment
- ☐ Well balanced

- 6) I would recommend this decision aid for patients who want more information about taking Niraparib.

|                   |          |         |       |                |
|-------------------|----------|---------|-------|----------------|
| Strongly Disagree | Disagree | Neutral | Agree | Strongly Agree |
|-------------------|----------|---------|-------|----------------|

Comment: \_\_\_\_\_

- 7) I am satisfied with the overall quality of this patient decision aid.

|                   |          |         |       |                |
|-------------------|----------|---------|-------|----------------|
| Strongly Disagree | Disagree | Neutral | Agree | Strongly Agree |
|-------------------|----------|---------|-------|----------------|

Comment: \_\_\_\_\_

- 8) What did you like about the patient decision aid?

\_\_\_\_\_

\_\_\_\_\_

- 9) Do you have any other suggestions for information that would be helpful to include on the patient decision aid?

\_\_\_\_\_

\_\_\_\_\_

## **Patient Decision Aid on Niraparib Treatment – Physician Survey**

**Please circle the best answer to each question.**

- 1) The language used was easy to follow.

|                   |          |         |       |                |
|-------------------|----------|---------|-------|----------------|
| Strongly Disagree | Disagree | Neutral | Agree | Strongly Agree |
|-------------------|----------|---------|-------|----------------|

Comment: \_\_\_\_\_

- 2) The amount of information provided was:

|                          |                            |             |                            |                          |
|--------------------------|----------------------------|-------------|----------------------------|--------------------------|
| Much less than<br>wanted | Little less than<br>wanted | About right | Little more than<br>wanted | Much more than<br>wanted |
|--------------------------|----------------------------|-------------|----------------------------|--------------------------|

Comment: \_\_\_\_\_

- 3) The length of the decision aid was:

|           |            |          |
|-----------|------------|----------|
| Too short | Just right | Too long |
|-----------|------------|----------|

Comment: \_\_\_\_\_

- 4) The Benefits and Harms sections were easy to follow:

|                   |          |         |       |                |
|-------------------|----------|---------|-------|----------------|
| Strongly Disagree | Disagree | Neutral | Agree | Strongly Agree |
|-------------------|----------|---------|-------|----------------|

Comment: \_\_\_\_\_

- 5) I found the decision aid was:

- ☐ Slanted towards treatment
- ☐ Slanted towards no treatment
- ☐ Well balanced

- 6) I would recommend this decision aid for patients who want more information about taking Niraparib.

|                   |          |         |       |                |
|-------------------|----------|---------|-------|----------------|
| Strongly Disagree | Disagree | Neutral | Agree | Strongly Agree |
|-------------------|----------|---------|-------|----------------|

Comment: \_\_\_\_\_

- 7) I am satisfied with the overall quality of this patient decision aid.

|                   |          |         |       |                |
|-------------------|----------|---------|-------|----------------|
| Strongly Disagree | Disagree | Neutral | Agree | Strongly Agree |
|-------------------|----------|---------|-------|----------------|

Comment: \_\_\_\_\_

- 8) What did you like about the patient decision aid?

\_\_\_\_\_

\_\_\_\_\_

- 9) Do you have any other suggestions for information that would be helpful to include on the patient decision aid?

\_\_\_\_\_

\_\_\_\_\_
